# Supplementary material for: Bisimidazoline arylamides binding to the DNA minor groove: N1-hydroxylation enhances binding affinity and selectivity to AATT sites
Source: Royal Society of Chemistry journal article supplement (doi:10.1039/c5md00292c), 2015-01-01
Supplement: c5md00292c1.pdf [file c5md00292c1.pdf]

Electronic Supplementary Information

**Bisimidazoline arylamides binding to the DNA minor groove. N1-hydroxylation enhances binding affinity and selectivity to AATT sites**

Carlos H. Ríos Martínez<sup>a†</sup>, Laura Lagartera<sup>a</sup>, Cristina Trujillo<sup>c</sup>, and Christophe Dardonville<sup>a\*</sup>

**Table of contents:**

- Figure S1: UV titration of **1a** and **5a** with AATT, (AT)<sub>4</sub>, and (CG)<sub>4</sub> hairpin oligonucleotides.
- Docking studies:
  - 1) Figure S2: optimized geometries of **1**, **1a**, **4**, **4a**, **5**, and **5a**
  - 2) Table S1: predicted binding affinities of the compounds with dsDNA containing CGAATTCG and CATATATAT
  - 3) Figure S3: **1** docked with the d(GCGAATTCG) oligonucleotide (pdb: 1ENN)
  - 4) Figure S4: **1a** docked with the d(GCGAATTCG) oligonucleotide (pdb: 1ENN)
  - 5) Figure S5: **1** docked with d(CCATATATATGC) oligonucleotide (pdb: 3TED)
  - 6) Figure S6: **1a** docked with d(CCATATATATGC) oligonucleotide (pdb: 3TED)
  - 7) Figure S7: NCI analysis of **1** and **1a** binding to 1ENN and 3TED
  - 8) Figure S8: plot of hydrogen bonds (HB) interactions for **1** and **1a** docked with d(GCGAATTCG) and d(CCATATATATGC)

**Figure S1.** UV titration of **1a** (left panels) and **5a** (right panels) with AATT (top), (AT)<sub>4</sub> (middle), and (CG)<sub>4</sub> (bottom) hairpin oligonucleotides

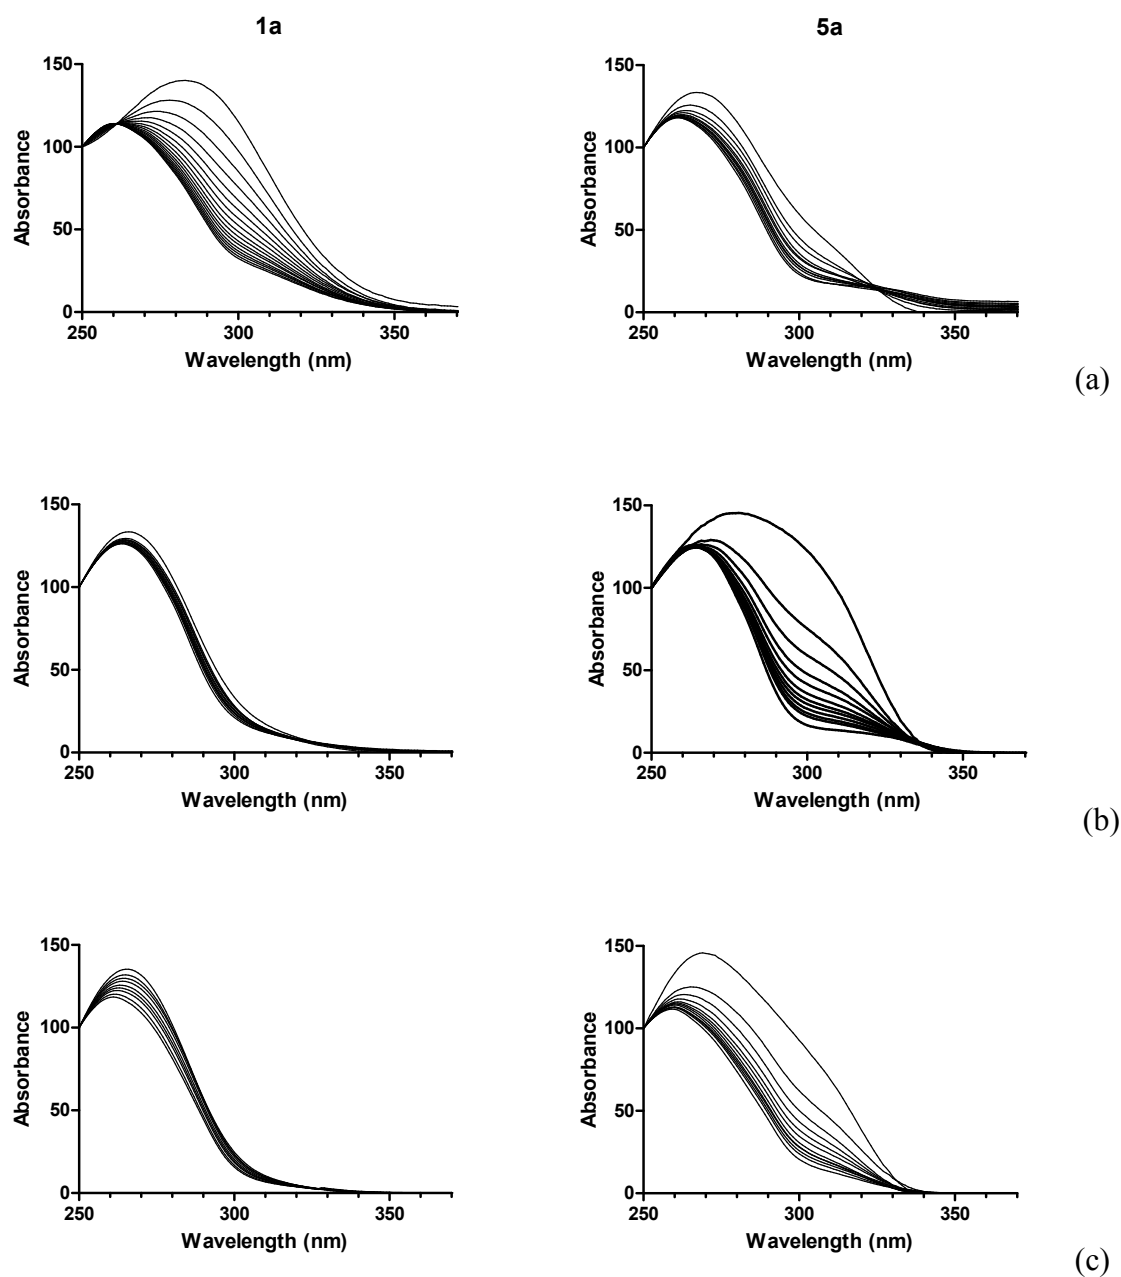

UV titration of **1a** and **5a** (2.5  $\mu\text{M}$ ) with AATT (top), (AT)<sub>4</sub> (middle), and (CG)<sub>4</sub> (bottom) hairpin oligonucleotides in 10 mM phosphate buffer at 25 °C. DNA concentrations ranged from 0 to  $3.92 \times 10^{-7}$  M (**1a**\_AATT), 0 to  $7.41 \times 10^{-7}$  M [**1a**\_(AT)<sub>4</sub>], 0 to  $8.2 \times 10^{-5}$  M [**1a**\_(CG)<sub>4</sub>], and 0 to  $7.41 \times 10^{-7}$  M (**5a**\_AATT, **5a**\_(AT)<sub>4</sub>, and **5a**\_(CG)<sub>4</sub>] from top to bottom.

## Docking studies

### 1) Figure S2: optimized geometries

All compounds have been optimized using the Gaussian09 package at the B3LYP computational level with the 6-311++G(d,p) basis sets. The effect of water solvation was then accounted using the SCFR-PCM approach implemented in the Gaussian09 package including dispersing, repulsing and cavitation energy terms of the solvent in the optimization.

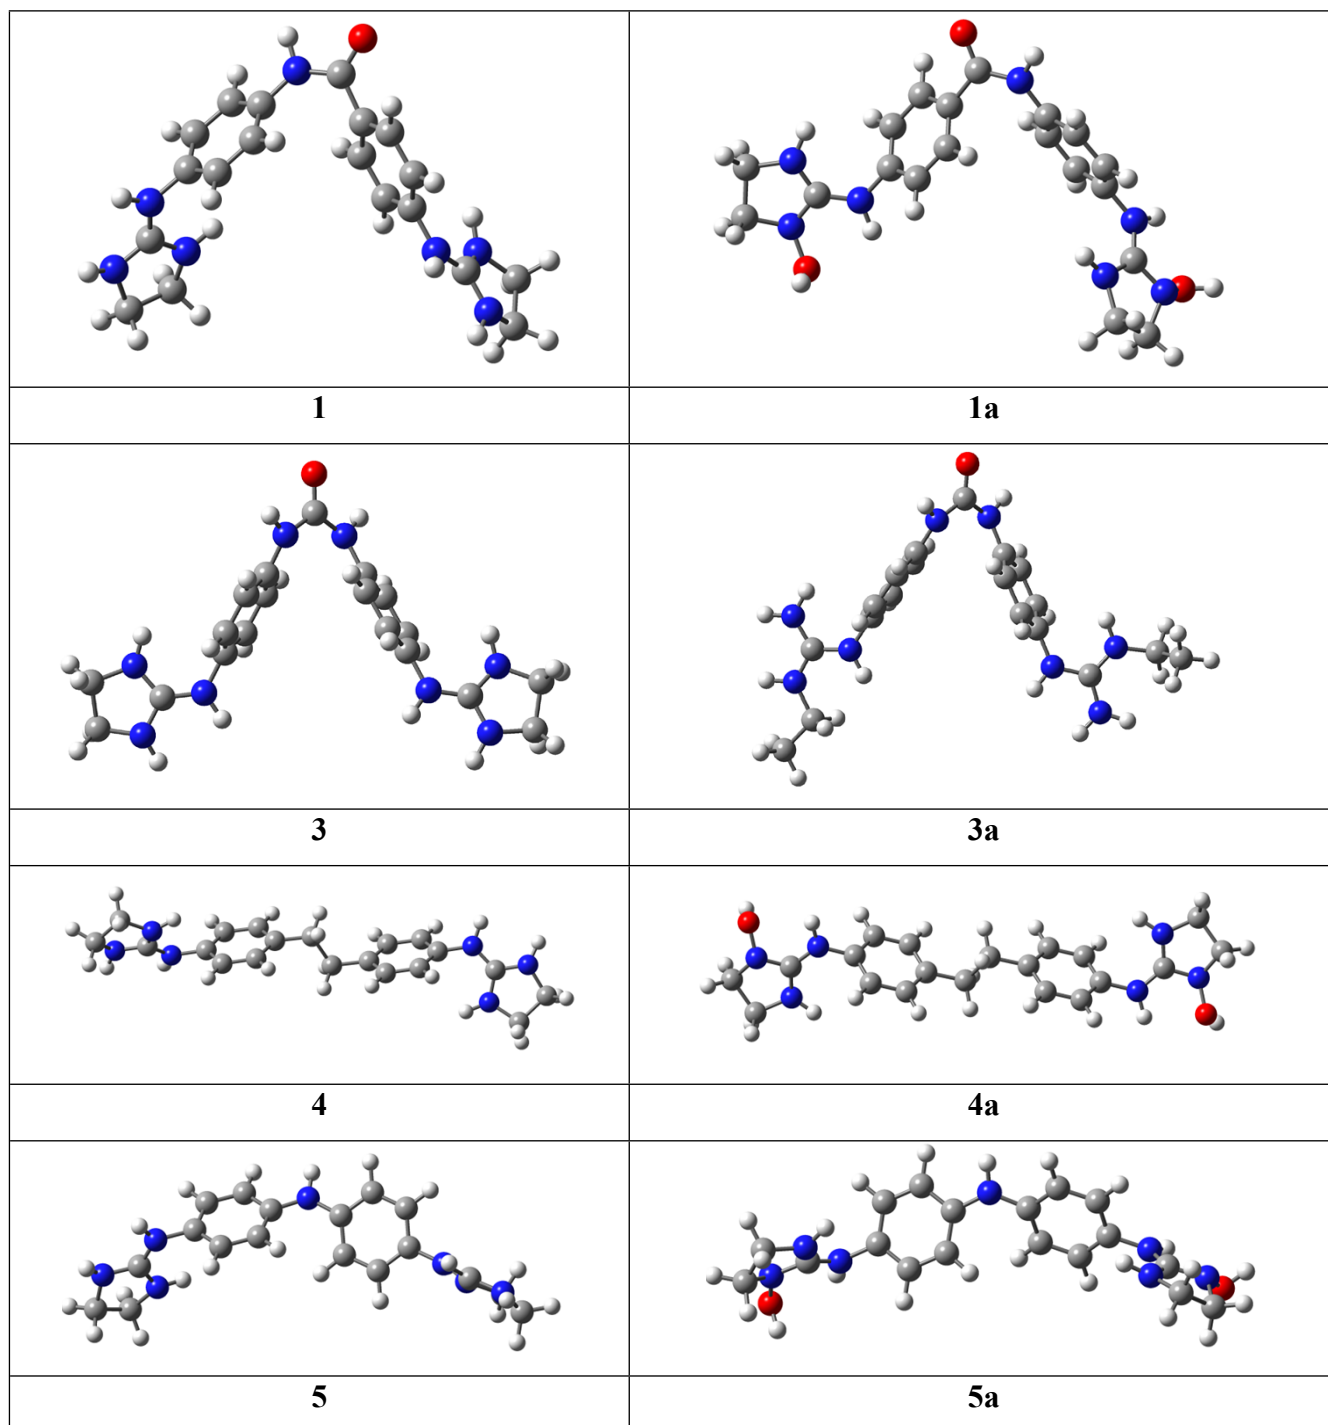

2) Table S1: predicted binding affinities of the compounds with dsDNA containing CGAATTCTG and CATATATAT

Docking calculations were performed with the AutoDock Vina 1.1.2 modelling software<sup>1</sup> using the crystallographic structures of d(GCGAATTCTG) [pdb: 1ENN] and d(CCATATATATGC) [pdb: 3TED].

**Table S1.** Predicted binding affinities (kcal/mol)

|           | <b>1ENN</b> | <b>3TED</b>     |
|-----------|-------------|-----------------|
| <b>1</b>  | -8.7        | -8.4            |
| <b>1a</b> | -9.1        | -9.1            |
| <b>3</b>  | -7.7        | nd <sup>a</sup> |
| <b>3d</b> | -6.7        | nd              |
| <b>4</b>  | -8.6        | -8.4            |
| <b>4a</b> | -8.6        | -8.7            |
| <b>4c</b> | -7.2        | nd              |
| <b>5</b>  | -8.7        | -8.4            |
| <b>5a</b> | -8.8        | -8.8            |

<sup>a</sup> Not determined

3) Figure S3: **1** docked with the d(GCGAATTCG) oligonucleotide (pdb: 1ENN)

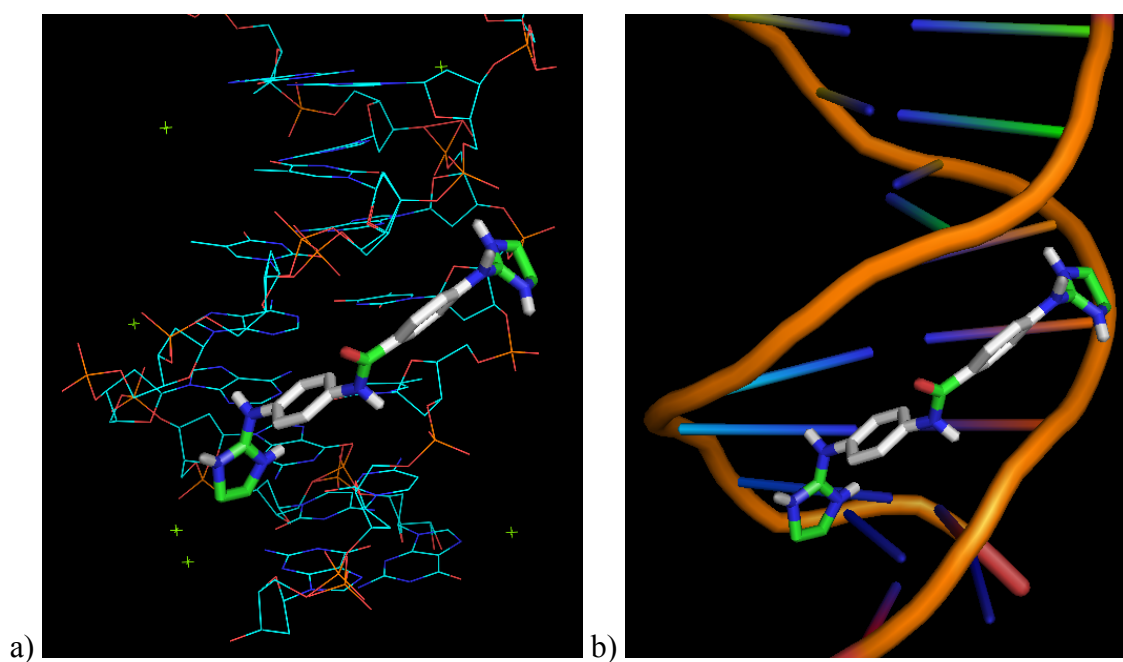

4) Figure S4: **1a** docked with the d(GCGAATTCG) oligonucleotide (pdb: 1ENN)

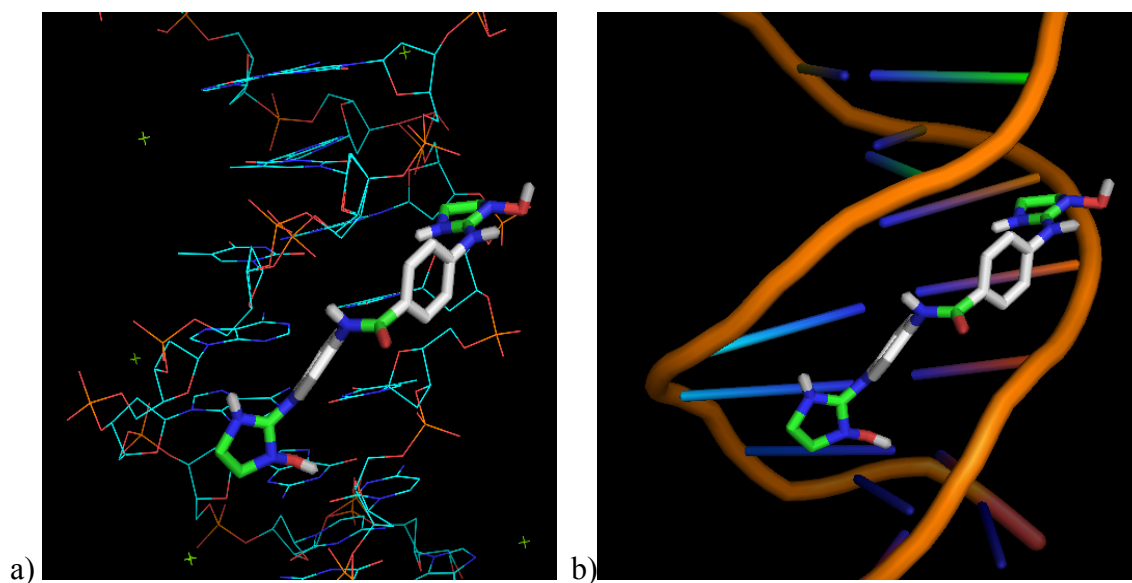

a) and b) are two images of the same complex drawn with Pymol [The PyMOL Molecular Graphics System, Version 1.3, Schrödinger, LLC., 2010].

5) Figure S5: **1** docked with the d(CCATATATATGC) oligonucleotide (pdb: 3TED)

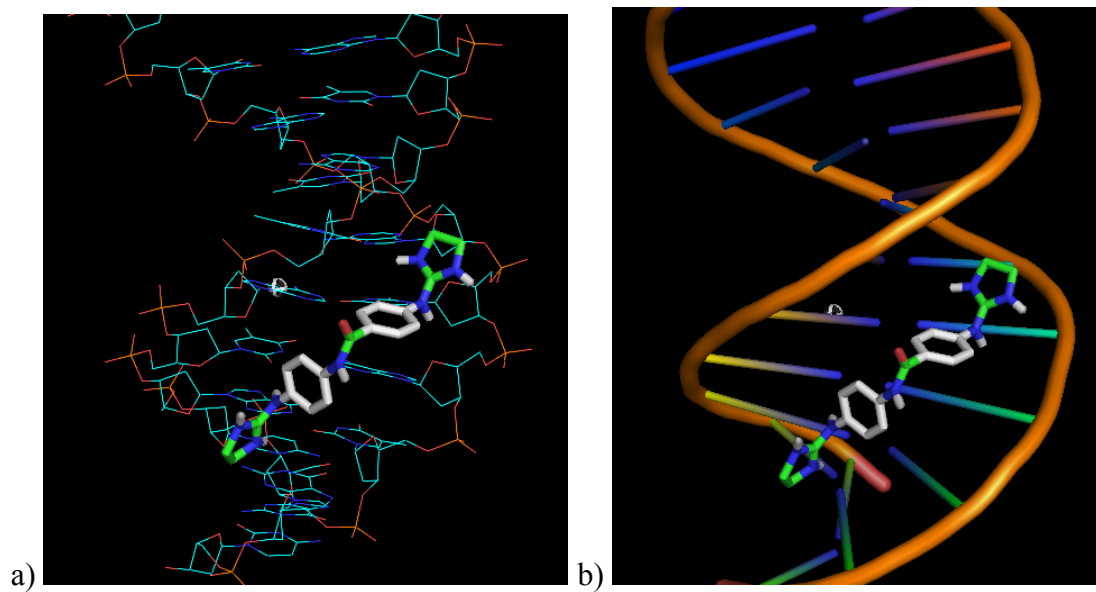

6) Figure S6: **1a** docked with the d(CCATATATATGC) oligonucleotide (pdb: 3TED)

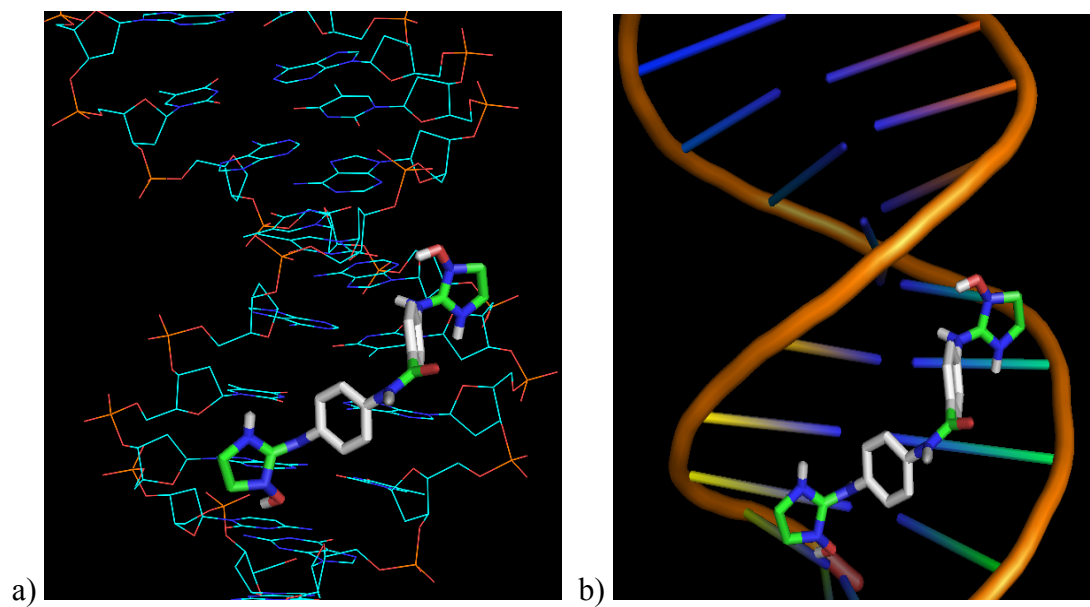

## 7) NCI Analysis

The Non-covalent Interaction (NCI) program<sup>2</sup> allows visualising the non covalent interactions resulting from complexation using the electron density Hessian. While NCI does not provide quantitative results is a very powerful qualitative tool.

Green areas denote weak ( $\lambda_2 \approx 0$ ) but attractive interactions, while blue ones indicate strong interactions (normally associated with hydrogen bonds). Larger areas correspond to more interaction regions.

**Figure S7.** NCI plot of non-covalent interaction of compound **1** (left) and **1a** (right) docked with 1ENN (upper pannels) and 3TED (bottom). Green areas correspond to  $\lambda_2 \approx 0$  (weak).  $\lambda_2$  is one of the three eigenvalues of the electron density Hessian with  $\lambda_1 \leq \lambda_2 \leq \lambda_3$ .

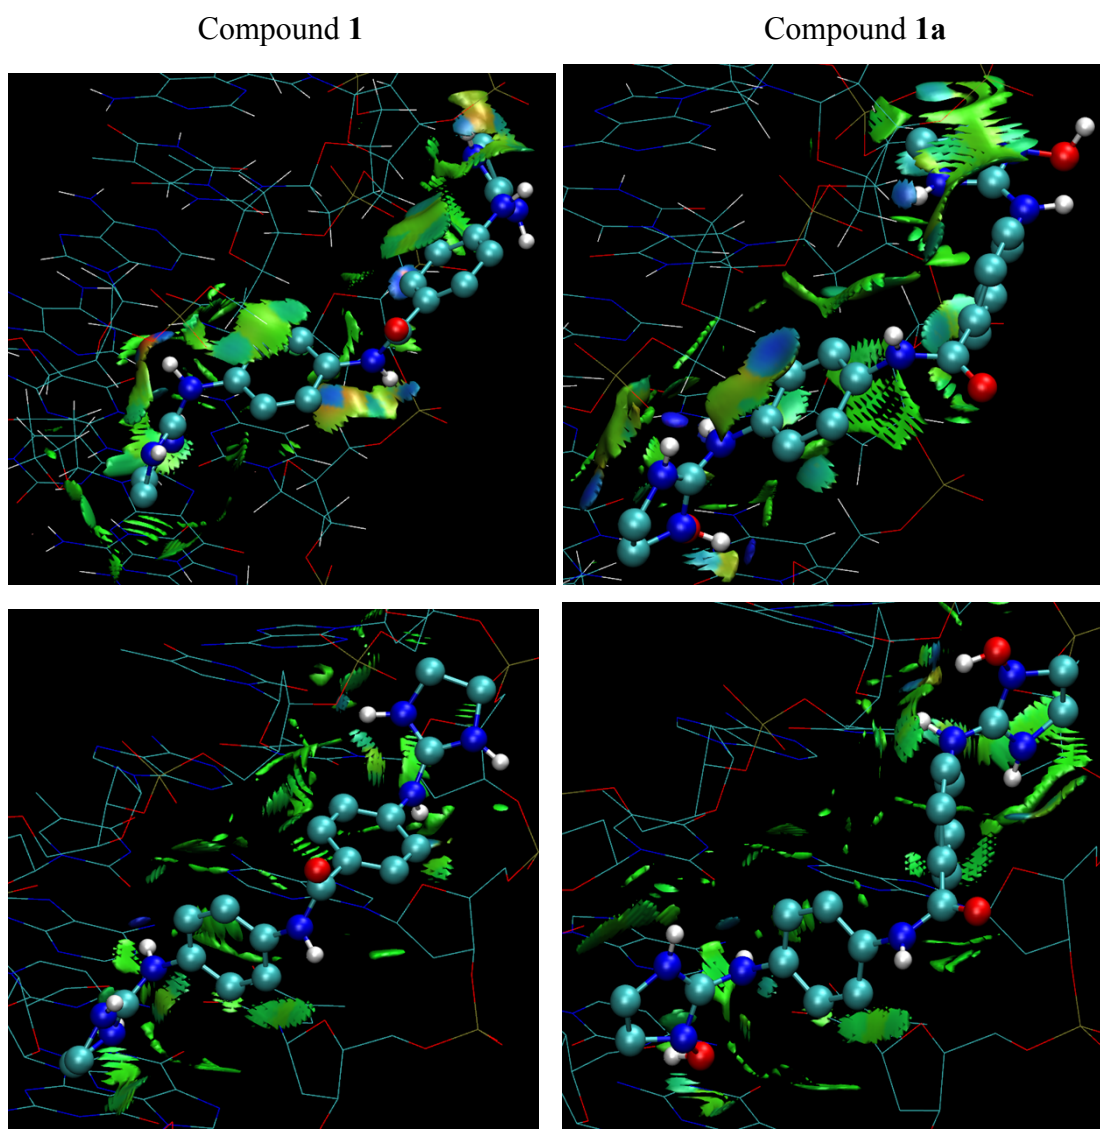

8) **Figure S8:** plot of hydrogen bonds (HB) interactions for **1** and **1a** docked with d(GCGAATTTCG) (pdb: 1ENN) and d(CCATATATATGC) (pdb: 3TED)

A) HB interactions for compound **1** bound to 1ENN:

- 1HB (2.19 Å) between phosphate (DC17) and amide NH of the ligand
- 1HB (2.35 Å) between the imidazoline exocyclic N(2)H and O4' atom of the adenine (DA5) deoxiribose
- 1HB (2.50 Å) between phosphate (DC8) and the imidazoline N(1)H

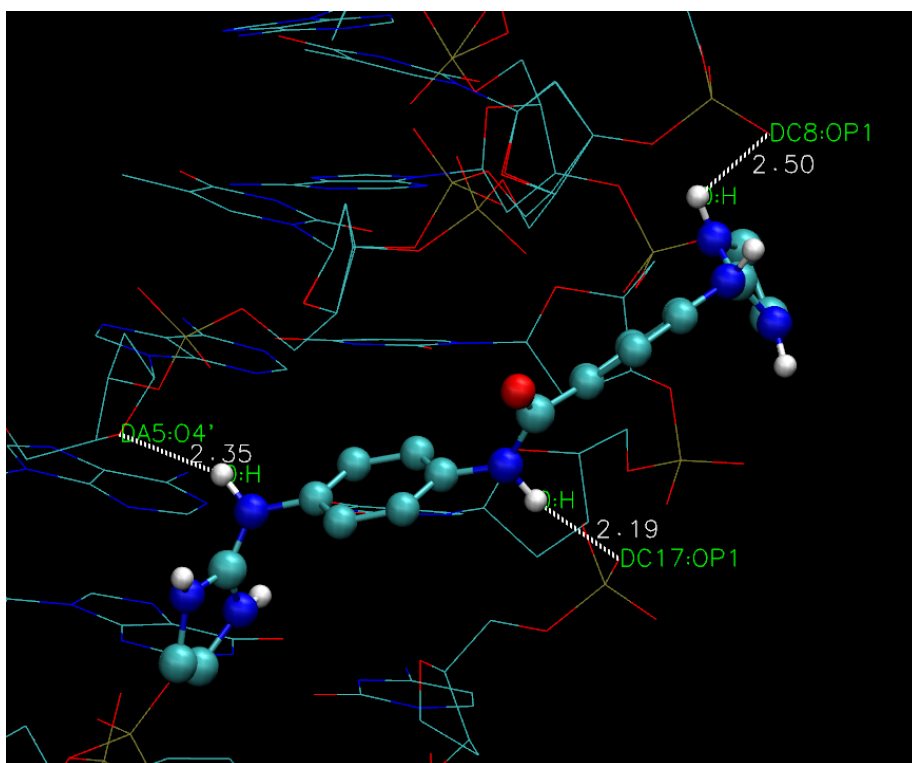



B) HB interactions for compound **1a** bound to 1ENN:

- 1HB (1.98 Å) between the imidazoline N(1)OH substituent and O4' atom of the cytosine (DC17) deoxyribose
- 1HB (2.03 Å) between phosphate and amide NH of the ligand
- 1HB (2.82 Å) between phosphate (DA5) and the imidazoline endocyclic N(3)H
- 1HB (2.86 Å) between phosphate (DT7) and the imidazoline endocyclic N(3)H of the second imidazoline group

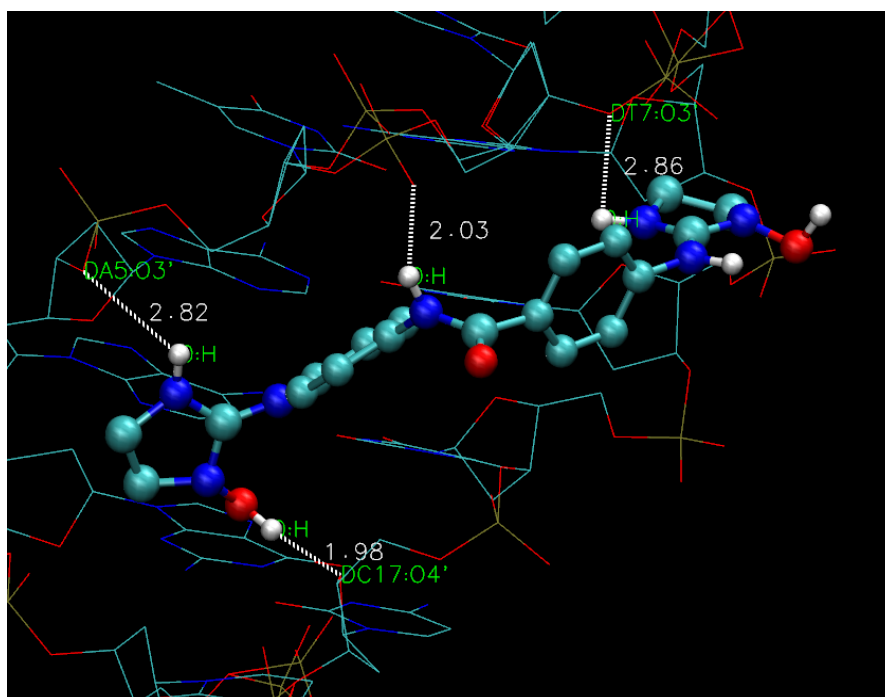

C) HB interactions for compound **1** bound to 3TED:

- 1 HB (1.92 Å) between thymine (DT4) and imidazoline N(2)H
- 1 HB (2.29 Å) between thymine (DT6) and imidazoline N(1)H
- 1 HB (2.25 Å) between the imidazoline exocyclic N(2)H and O4' atom of the adenine (DA9) deoxiribose

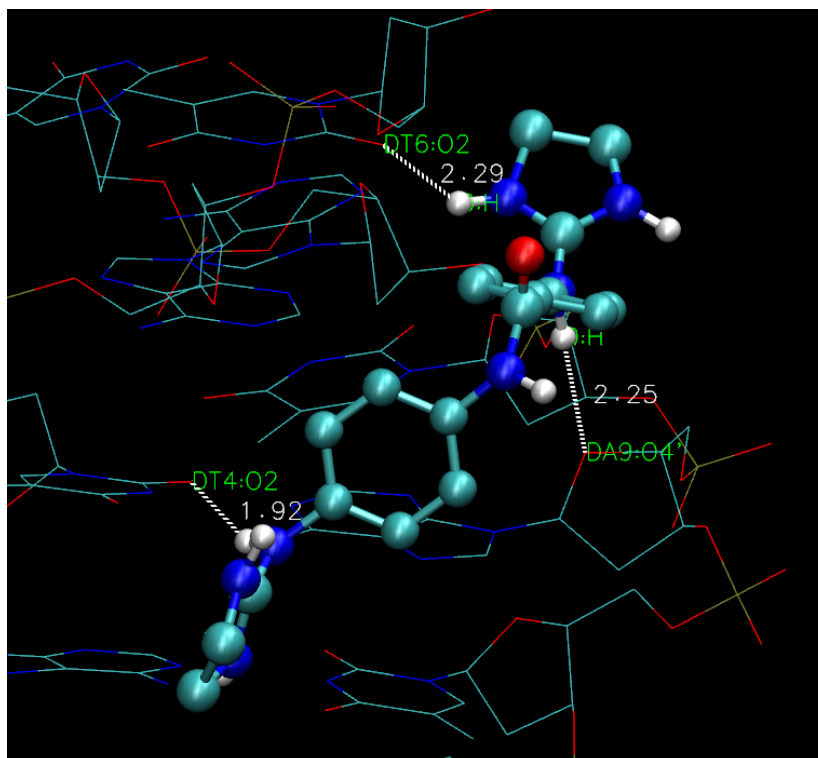

D) HB interactions for compound **1a** bound to 3TED:

- 1 bifurcated HB (2.19 and 2.25 Å) between thymine (DT6) and imidazoline N(2)H and N(1)OH.
- 1 HB (2.30 Å) between the imidazoline N(3)H and O4' atom of the adenine (DA9)

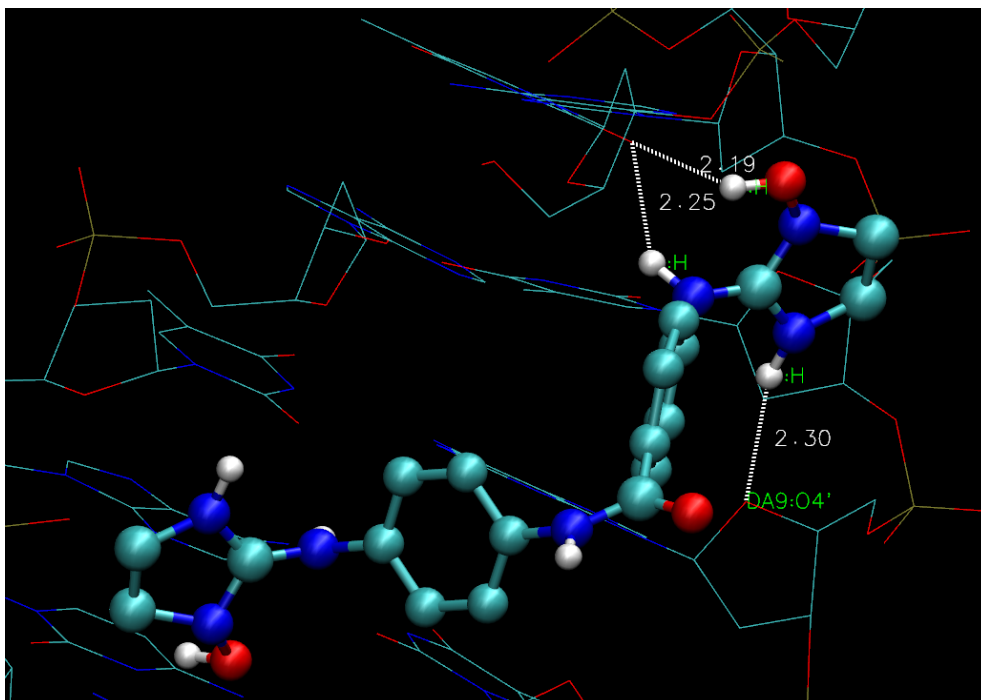

## References

1. Trott, O.; Olson, A. J. AutoDock Vina: Improving the speed and accuracy of docking with a new scoring function, efficient optimization, and multithreading. *J. Comput. Chem.* **2010**, 31, 455-461.
2. Johnson, E. R.; Keinan, S.; Mori-Sanchez, P.; Contreras-Garcia, J.; Cohen, A. J.; Yang, W. Revealing Noncovalent Interactions. *Journal of the American Chemical Society* **2010**, 132, 6498-6506.
